# Supplementary material for: Cost-effectiveness of allergic rhinitis treatment: An exploratory study
Source: PubMed Central journal article supplement — SAGE Open Med. 2018 Aug 18;6:2050312118794588. doi: 10.1177/2050312118794588 (PMC6100121; doi:10.1177/2050312118794588), 2018-08-18
Supplement: Appendix_1.pdf [file Appendix_1.pdf]

## Appendix 1: Recalculation of the symptom score

---

### *Different scales:*

The following calculation was performed to convert the symptom scores on a 6-point scale (0-5) to scores on a 4-point scale (0-3):

If a patient had a maximum symptom score of 5 on a 6-point scale, the patient would receive a score of 3 on a 4-point scale. To change a score on a 6-point scale (5) to a score on a 4-point scale (3), the score should be multiplied by 0.6 ( $5 * 0.6 = 3$ ). For this reason, all scores based on a 6-point scale were multiplied by 0.6 to obtain the corresponding values on a 4-point scale.

- Score of 5 (6-point scale)  $\triangleq$  Score of 3 (4-point scale)
- Score of 4 (6-point scale)  $\triangleq$  Score of 2.4 (4-point scale)
- Score of 3 (6-point scale)  $\triangleq$  Score of 1.8 (4-point scale)
- Score of 2 (6-point scale)  $\triangleq$  Score of 1.2 (4-point scale)
- Score of 1 (6-point scale)  $\triangleq$  Score of 0.6 (4-point scale)
- Score of 0 (6-point scale)  $\triangleq$  Score of 0 (4-point scale)

### *Percentages:*

In some studies, the improvement of the symptom score was reported as a percentage. The following calculation was performed to convert these values to a 4-point scale:

- An improvement of the scores by 100%  $\triangleq$  Score of 3
- An improvement of the scores by 66.6% (2/3)  $\triangleq$  Score of 2
- An improvement of the scores by 33.3% (1/3)  $\triangleq$  Score of 1
- An improvement of the scores by 0%  $\triangleq$  Score of 0
